# Supplementary material for: LncRNA PFL contributes to cardiac fibrosis by acting as a competing endogenous RNA of let-7d
Source: PubMed Central journal article supplement — Theranostics. 2018 Feb 2;8(4):1180–94. doi: 10.7150/thno.20846 (PMC5817119; doi:10.7150/thno.20846), 2018-02-02
Supplement: thnov08p1180s1.pdf [file thnov08p1180s1.pdf]

TCTTTTTAGCTACTCTCTACTTTCTAATATTTCTAAATCCTCCCCAAAT  
GCTTAGCCCCAAATAATCAGTCATGAGTCTGAGGAGGACATGCCATG  
CCATATTTAATGCAAATGCTCATGATTAGTGATAATAAAATTAACCT  
TCAAGTATGTTTTAGGAACTTTAATCAACATTGTTTGTTAATCTGTGA  
AGTAATTTCCATGTAACCCGGAAGAGTTGGAACATGCTCTGACTCTAC  
CACACATTTTATGATGACATTCCATCTGCCCTCACAATATGGTGAGGT  
CCTACATTTCCAAGAATGATTGGAATTAGTGTTGTAACCTTGACAATA  
AAATGCTACCTGACAAAGACATCTTATTTGTAAATTTTAGCTTAAGTG  
TTTAGCTTCTTTTTAAAGATTTTGGAAGTCCTAAGGGAGTCAAGATTT  
GAGAAAAGTCTCTAGTATTCATTTGATATGCTAAAATTTAGAGGTTTT  
TTTTTTTTGGAGCATGAGTATATGTAAATTTTCTTAAAATTTTATCCA  
GAGCCAGTTTTTCATGATCACTTAAAAATTAATAAAAAAAAAATCTGTACC  
ACAAGCACAGATACACCCTTCcacacacagacacagagacacacacacagacacacaga  
gagcacacatacacacagacacacacagaaagacacacacacagctactcacacGTTTCATGCAT  
GTGTGTGTGTATAACATGTTTCATGTTtgatgggtgcaggtgatatgcatagagagatcaga  
aggtgtttgaggtgtcaagctgaagaatgtaatttatctgcatagacacagatattttattgttcttaagtcaccaat  
taggctaaaccatgtggccagcaaaccacagggatcctcctgctctgacatccaacaattacaacatgtctggc  
atttacattagttctgggaattaaaaccaggcactaatgctcatgaggcaagcactttactatctcatcctcctta  
gccAACACTTGATTTTTTTCCAGAACTGTAAACTTGTA AAACTAATTGT  
CACCTGTGCCATGAACAAGAACAGTAGCATGATTGTAAGATACTCAA  
AGATTATTTAATCCCTCAGAACTTTCATTCAGCCATACAAAAATACTT  
TCTTATGTGAATTTTTATCCAAACCACTTGTTTCATAATCAACCTACTCA  
AAGTGCAAGTGAATATTTTTCACTTGAATTCAGAATTTATAAGACAG  
ATGTTGACAGTTGATTTAATCTGTATTGATATAGGATTTCAAAGATT  
TTCCCATGGTTAAATCTTCACTTTAGGATTTTTGTATTTGATTTTGCA

**CTTGTCCCATTAATTATTTCTTTTTCTTTAAATATCCAGGGAAAGTTGA  
TGGTCCTTAGTCTAAAATTATTTCTGGCAAATGACCAAAGAACAGAT  
TATATTTTTTCTTCAGGAAGAGTATCATCTGCATATCCTCCCCAAAGT  
CAGGATTCTTGTC**

**Supplementary Figure 1.** The sequence of lncRNA NONMMUT022555 (PFL).

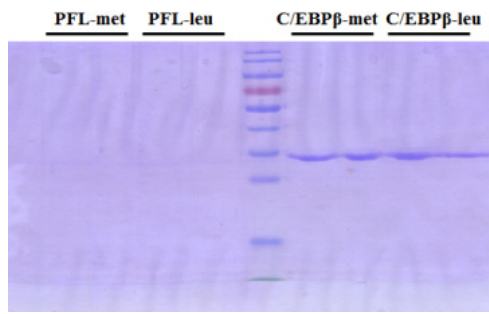

**Supplementary Figure 2.** In vitro translation assay confirmed the PFL is really a non-coding RNA without protein-coding function. C/EBP $\beta$  act as a positive control. met: methionine; leu: leucine.

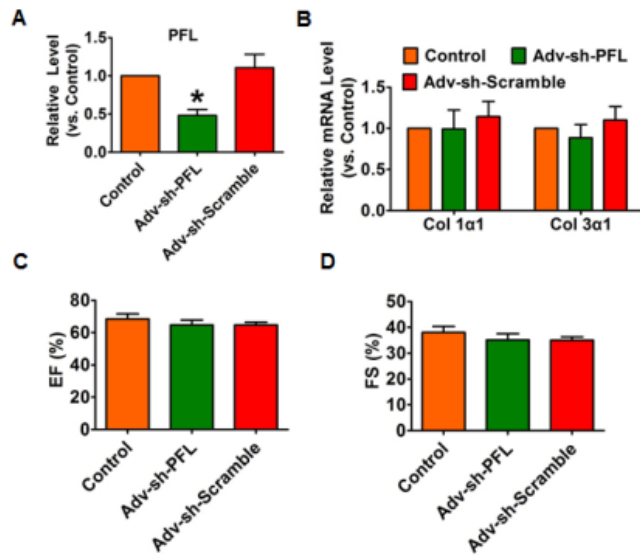

**Supplementary Figure 3.** Tail vein injection of Adv-sh-PFL in normal mice (A) have no effect on collagen deposition (B) and heart function (C-D). n=7 mice per group, \* $p < 0.05$  vs. Control.

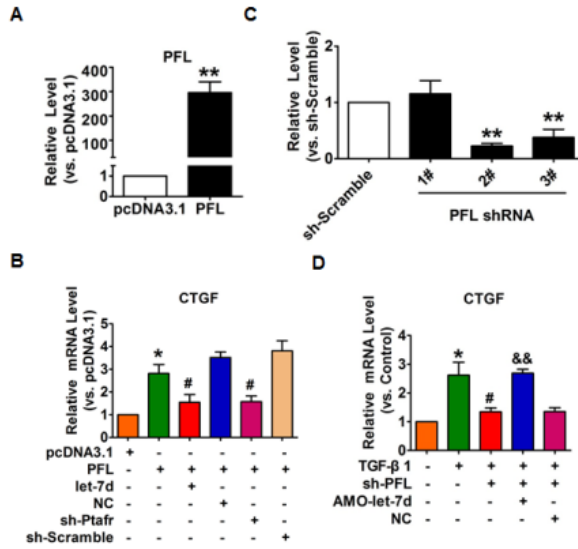

**Supplementary Figure 4.** Knockdown of PFL attenuated fibrogenesis in CFs. (A)

The expression of PFL in cultured CFs transfected with pcDNA3.1 carrying PFL.

\*\* $p < 0.01$  vs. pcDNA3.1; (B) PFL increased the mRNA expression of CTGF. \* $p < 0.05$

vs. pcDNA3.1; # $p < 0.05$  vs. PFL; (C) The expression of PFL in cultured CFs

transfection of PFL specific shRNA, only the 2# and 3# shRNA were able to inhibit

the expression of PFL. \*\* $p < 0.01$  vs. sh-Scramble; (D) Silence of PFL abated

TGF-β1-induced CTGF expression.  $n = 5$ . \* $p < 0.05$ , \*\* $p < 0.01$  vs. Control; # $p < 0.05$  vs.

TGF-β1; && $p < 0.01$  vs. TGF-β1+sh-PFL.

**Table S1. Sequences of qRT-PCR primers**

| <b>Gene name</b>      | <b>Forward primer(5'-3')</b> | <b>Reverse primer (5'-3')</b> |
|-----------------------|------------------------------|-------------------------------|
| <i>Ptafr</i>          | GCCCAATAAGGATGGCTCAG         | AAGAAGCAGAAGGCGATGAA          |
| Collagen 1 $\alpha$ 1 | CAATGGCACGGCTGTGTGCG         | CACTCGCCCTCCCGTCTTTGG         |
| Collagen 3 $\alpha$ 1 | TTGAATATCAAACCGCAAGGC        | GGTCACTTTCCTGGTTGACGA         |
| CTGF                  | GCTAAGTTCTGCGGGGTGT          | GTAATGGCAGGCACAGGTCT          |
| let-7d                | GGGAGAGGTAGTAGGTTG           | TGGAGTCGGCAATTGCAC            |
| NONMMUT 021928        | TGTTCCCTCCTCCCTTGATAG        | CCAGAATATCAAACGTCCCAG         |
| NONMMUT 022555        | CACCCTTCCACACACAGACA         | CACCTGCACCCATACAAACA          |
| NONMMUT 065582        | GTAGGTCGAGATGGGTCCAA         | GCAGCAAGTATGTGGAGGCA          |
| GAPDH                 | GGGGCTCTCTGCTCCTCCCTG        | CGGCCAAATCCGTTACACCG          |
| U6                    | GCTTCGGCAGCACATATACTAAAAT    | CGCTTCACGAATTTGCGTGTCAT       |

**Table S2. Sequences of shRNA**

| <b>Gene name</b> | <b>shRNA No.</b> | <b>Target sequences</b>                                      |
|------------------|------------------|--------------------------------------------------------------|
| <i>Ptafr</i>     | 1#               | GCTATGTGCTATGGGTCTTTG TTCAAGAGA CAAAGACCCATAGCACATAGCTTTTTT  |
|                  | 2#               | GCTACCAGGCAGTAGCCTATC TTCAAGAGA GATAGGCTACTGCCTGGTAGCTTTTTT  |
|                  | 3#               | GCCCATCCTTGTTGTTTCATGT TTCAAGAGA ACATGAACAACAAGGATGGGCTTTTTT |
| NONMMUT 022555   | 1#               | GGAAGAGTTGGAACATGCTCTTTCAAGAGAAGAGCATGTTCCAACCTTCCTTTTT      |
|                  | 2#               | GAAGTCCTAAGGGAGTCAAGATTCAAGAGATCTTGACTCCCTTAGGACTTCTTTTT     |
|                  | 3#               | GGAAAGTTGATGGTCCTTAGTTTCAAGAGAACTAAGGACCATCAACTTTCCTTTTT     |

Ptafr: platelet-activating factor receptor.

**Table S3. Predicted miRNAs that contain potential binding sequences for PFL**

|                  |             |    |                                 |
|------------------|-------------|----|---------------------------------|
| mmu-let-7g-5p    | 328 ~ 349   | 22 | ttgacaataaaatgctacctga          |
| mmu-let-7g-5p    | 965 ~ 990   | 26 | catgaggcaagcactttactatctca      |
| mmu-let-7i-5p    | 971 ~ 990   | 20 | gcaagcactttactatctca            |
| mmu-let-7i-5p    | 328 ~ 349   | 22 | ttgacaataaaatgctacctga          |
| mmu-let-7i-5p    | 869 ~ 894   | 26 | caaaccacagggatcctcctgectct      |
| mmu-miR-1a-1-5p  | 124 ~ 154   | 31 | agtgataataaaattaaaccttcaagtatgt |
| mmu-miR-1a-3p    | 240 ~ 264   | 25 | ccacacattttatgatgacattcca       |
| mmu-miR-23b-5p   | 142 ~ 165   | 24 | ccttcaagtatgttttaggaactt        |
| mmu-miR-29b-1-5p | 836 ~ 861   | 26 | taagtcaccaattaggctaaaccatg      |
| mmu-miR-29b-1-5p | 934 ~ 954   | 21 | gttctgggaattaaaccagg            |
| mmu-miR-99b-5p   | 717 ~ 740   | 24 | tacatgttcatgtttgatgggtg         |
| mmu-miR-125a-3p  | 1033 ~ 1058 | 26 | aacttgtaaaactaattgtcacctgt      |
| mmu-miR-125a-3p  | 1446 ~ 1469 | 24 | ttcttcaggaagagtatcatctgc        |
| mmu-miR-130a-3p  | 1322 ~ 1343 | 22 | ttttgatattgattttgcactt          |
| mmu-miR-9-5p     | 1405 ~ 1430 | 26 | aattatttctggcaaatgaccaaag       |
| mmu-miR-136-3p   | 239 ~ 258   | 20 | accacacattttatgatgac            |
| mmu-miR-140-5p   | 1154 ~ 1175 | 22 | tgaattttatccaaaccactt           |
| mmu-miR-140-5p   | 854 ~ 878   | 25 | aaaccatgtggccagcaaaccacag       |
| mmu-miR-141-3p   | 1227 ~ 1249 | 23 | cagaatttataagacagatgttg         |
| mmu-miR-145-3p   | 1427 ~ 1457 | 31 | aaagaacagattatatttttcttcaggaag  |
| mmu-miR-149-5p   | 515 ~ 537   | 23 | ttaaaattttatccagagccagt         |



|                 |             |    |                             |
|-----------------|-------------|----|-----------------------------|
| mmu-miR-150-3p  | 558 ~ 579   | 22 | ttaaaaaaaaaatctgtaccac      |
| mmu-miR-151-3p  | 1384 ~ 1404 | 21 | agttgatggccttagtctaa        |
| mmu-miR-182-5p  | 278 ~ 302   | 25 | tatggtgaggcctacattccaag     |
| mmu-miR-183-5p  | 1042 ~ 1064 | 23 | aactaattgtcacctgtgccatg     |
| mmu-miR-186-5p  | 1476 ~ 1497 | 22 | tcccaaagtcaggattcttgt       |
| mmu-miR-186-5p  | 1421 ~ 1448 | 28 | tgacaaaagaacagattatatttttc  |
| mmu-miR-187-3p  | 591 ~ 613   | 23 | caccctccacacacagacacag      |
| mmu-miR-190-5p  | 901 ~ 920   | 20 | caacaattacaacatgtct         |
| mmu-miR-190-5p  | 1454 ~ 1475 | 22 | gaagagtatcatctgcatatcc      |
| mmu-miR-191-3p  | 1183 ~ 1204 | 22 | atcaacctactcaaagtgaag       |
| mmu-miR-200b-5p | 1071 ~ 1093 | 23 | aacagtagcatgattgtaagata     |
| mmu-miR-201-3p  | 811 ~ 834   | 24 | tagacacagatattttattgttct    |
| mmu-miR-203-3p  | 281 ~ 300   | 20 | ggtgaggcctacattcca          |
| mmu-miR-206-3p  | 240 ~ 264   | 25 | ccacacattttatgatgacattcca   |
| mmu-miR-30e-5p  | 370 ~ 390   | 21 | attttagcttaagtgtttagc       |
| mmu-miR-290-3p  | 940 ~ 960   | 21 | ggaattaaaaccaggcactaa       |
| mmu-miR-290-3p  | 903 ~ 928   | 26 | acaattacaacatgtctggcattta   |
| mmu-miR-291a-3p | 960 ~ 981   | 22 | atgctcatgaggcaagcacttt      |
| mmu-miR-292-3p  | 904 ~ 928   | 25 | caattacaacatgtctggcattta    |
| mmu-miR-292-3p  | 940 ~ 960   | 21 | ggaattaaaaccaggcactaa       |
| mmu-miR-294-5p  | 752 ~ 780   | 29 | tcatagagagatcagaagggtttgagg |
| mmu-miR-294-3p  | 960 ~ 981   | 22 | atgctcatgaggcaagcacttt      |
| mmu-miR-295-5p  | 416 ~ 436   | 21 | taagggagtcaagatttgaga       |

|                  |             |    |                               |
|------------------|-------------|----|-------------------------------|
| mmu-miR-295-3p   | 960 ~ 981   | 22 | atgctcatgaggcaagcacttt        |
| mmu-miR-297a-5p  | 632 ~ 653   | 22 | acacagagacgcacacatacac        |
| mmu-miR-297a-5p  | 572 ~ 593   | 22 | tgtaccacaagcacagatacac        |
| mmu-miR-298-5p   | 874 ~ 897   | 24 | cacagggatcctcctgcctctgac      |
| mmu-miR-300-5p   | 1432 ~ 1453 | 22 | acagattatatttttctcag          |
| mmu-miR-301a-3p  | 1320 ~ 1343 | 24 | attttgtattgatttgcactt         |
| mmu-miR-302a-3p  | 954 ~ 981   | 28 | gcactaatgctcatgaggcaagcacttt  |
| mmu-miR-34c-3p   | 110 ~ 130   | 21 | aatgctcatgattagtata           |
| mmu-miR-34b-3p   | 110 ~ 130   | 21 | aatgctcatgattagtata           |
| mmu-let-7d-5p    | 969 ~ 990   | 22 | aggcaagcacttactatctca         |
| mmu-let-7d-5p    | 873 ~ 894   | 22 | ccacagggatcctcctgcctct        |
| mmu-miR-106a-5p  | 954 ~ 982   | 29 | gcactaatgctcatgaggcaagcacttta |
| mmu-miR-106b-5p  | 958 ~ 982   | 25 | taatgctcatgaggcaagcacttta     |
| mmu-miR-130b-3p  | 1323 ~ 1343 | 21 | tttgtattgatttgcactt           |
| mmu-miR-19b-2-5p | 1022 ~ 1045 | 24 | ccagaactgtaaacttgtaaact       |
| mmu-miR-19b-3p   | 1318 ~ 1342 | 25 | ggattttgtattgatttgcact        |
| mmu-miR-30c-2-3p | 1278 ~ 1299 | 22 | gattcaaaagattttcccat          |
| mmu-miR-148a-5p  | 1102 ~ 1123 | 22 | ttattaatccctcagaacttt         |
| mmu-miR-148a-5p  | 1217 ~ 1235 | 19 | actgaattcagaattta             |
| mmu-miR-196a-5p  | 327 ~ 348   | 22 | ttgacaataaaatgctacctg         |
| mmu-miR-200a-5p  | 1074 ~ 1093 | 20 | agtagcatgattgtaagata          |
| mmu-let-7a-5p    | 969 ~ 990   | 22 | aggcaagcacttactatctca         |
| mmu-let-7a-5p    | 330 ~ 349   | 20 | gacaataaaatgctacctga          |

|                  |             |    |                               |
|------------------|-------------|----|-------------------------------|
| mmu-let-7b-5p    | 969 ~ 990   | 22 | aggcaagcactttactatctca        |
| mmu-let-7b-5p    | 871 ~ 894   | 24 | aaccacagggatcctcctgcctct      |
| mmu-let-7c-5p    | 969 ~ 990   | 22 | aggcaagcactttactatctca        |
| mmu-let-7c-5p    | 873 ~ 894   | 22 | ccacagggatcctcctgcctct        |
| mmu-let-7c-5p    | 330 ~ 349   | 20 | gacaataaaatgctacctga          |
| mmu-let-7e-5p    | 873 ~ 894   | 22 | ccacagggatcctcctgcctct        |
| mmu-let-7f-5p    | 969 ~ 990   | 22 | aggcaagcactttactatctca        |
| mmu-let-7f-5p    | 324 ~ 349   | 26 | aactttgacaataaaatgctacctga    |
| mmu-miR-20a-5p   | 954 ~ 982   | 29 | gcactaatgctcatgaggcaagcacttta |
| mmu-miR-22-5p    | 776 ~ 797   | 22 | tgagggtcaagctgaagaatg         |
| mmu-miR-26a-1-3p | 1413 ~ 1436 | 24 | ctggcaaatgaccaaagaacaga       |
| mmu-miR-26b-3p   | 1057 ~ 1076 | 20 | gtgcatgaacaagaacagt           |
| mmu-miR-26b-3p   | 1413 ~ 1436 | 24 | ctggcaaatgaccaaagaacaga       |
| mmu-miR-29a-5p   | 744 ~ 767   | 24 | gtgatatgcatagagagatcaga       |
| mmu-miR-31-5p    | 1477 ~ 1498 | 22 | ccccaaagtcaggattcttgc         |
| mmu-miR-93-5p    | 959 ~ 982   | 24 | aatgctcatgaggcaagcacttta      |
| mmu-miR-96-5p    | 762 ~ 787   | 26 | atcagaaggtgtttgagggtcaag      |
| mmu-miR-96-3p    | 103 ~ 124   | 22 | ttaatgcaaatgctcatgatta        |
| mmu-miR-96-3p    | 1066 ~ 1086 | 21 | acaagaacagtagcatgattg         |
| mmu-miR-98-5p    | 970 ~ 990   | 21 | ggcaagcactttactatctca         |
| mmu-miR-98-5p    | 330 ~ 349   | 20 | gacaataaaatgctacctga          |
| mmu-miR-322-3p   | 712 ~ 731   | 20 | gtgtatacatgttcatgttt          |
| mmu-miR-326-5p   | 868 ~ 894   | 27 | gcaaaccacagggatcctcctgcctct   |

|                  |             |    |                                |
|------------------|-------------|----|--------------------------------|
| mmu-miR-328-5p   | 874 ~ 895   | 22 | cacagggatcctcctgcctctg         |
| mmu-miR-328-5p   | 252 ~ 274   | 23 | tgatgacattccatctgcctca         |
| mmu-miR-148b-5p  | 1095 ~ 1123 | 29 | tcaaagattatattaatccctcagaacttt |
| mmu-miR-148b-5p  | 1008 ~ 1031 | 24 | cacttgattttttccagaactgt        |
| mmu-miR-148b-5p  | 1212 ~ 1235 | 24 | tttctactgaatttcagaattta        |
| mmu-miR-344-5p   | 59 ~ 83     | 25 | caaataatcagtcgatgagtctgagg     |
| mmu-miR-350-5p   | 1326 ~ 1344 | 19 | gtatttgatttgacttg              |
| mmu-miR-135b-3p  | 276 ~ 295   | 20 | aatatggtgaggtcctacat           |
| mmu-miR-1a-2-5p  | 126 ~ 154   | 29 | tgataataaaattaaacctcaagtatgt   |
| mmu-miR-10a-3p   | 1142 ~ 1161 | 20 | tactttcttatgtgaatttt           |
| mmu-miR-17-5p    | 954 ~ 982   | 29 | gcactaatgctcatgaggcaagcacttta  |
| mmu-miR-19a-5p   | 1025 ~ 1046 | 22 | gaactgtaaacttgtaaaacta         |
| mmu-miR-19a-3p   | 1318 ~ 1342 | 25 | ggatttttgatttgatttgact         |
| mmu-miR-32-5p    | 1183 ~ 1205 | 23 | atcaacctactcaaagtgaagt         |
| mmu-miR-100-5p   | 717 ~ 740   | 24 | tacatgttcatgtttgatgggtg        |
| mmu-miR-210-3p   | 626 ~ 647   | 22 | agacacacacagagacgcacac         |
| mmu-miR-218-5p   | 567 ~ 587   | 21 | aaatctgtaccacaagcacag          |
| mmu-miR-26a-2-3p | 1413 ~ 1436 | 24 | ctggcaaatgacaaaagaacaga        |
| mmu-miR-26a-2-3p | 1055 ~ 1076 | 22 | ctgtgccatgaacaagaacagt         |
| mmu-miR-33-5p    | 90 ~ 111    | 22 | tgccatgccatatttaatgcaa         |
| mmu-miR-221-3p   | 843 ~ 866   | 24 | ccaattaggctaaacctgtggcc        |
| mmu-miR-29b-2-5p | 832 ~ 860   | 29 | tctctaagtcaccaattaggctaaacct   |
| mmu-miR-19b-1-5p | 1023 ~ 1045 | 23 | cagaactgtaaacttgtaaaact        |

|                   |             |    |                                  |
|-------------------|-------------|----|----------------------------------|
| mmu-miR-125b-1-3p | 196 ~ 213   | 18 | aattccatgtaaccgg                 |
| mmu-miR-7a-2-3p   | 1161 ~ 1179 | 19 | ttatccaaaccactgttc               |
| mmu-miR-7b-3p     | 1158 ~ 1179 | 22 | ttttatccaaaccactgttc             |
| mmu-miR-363-5p    | 244 ~ 268   | 25 | acattttatgatgacattccatctg        |
| mmu-miR-365-1-5p  | 261 ~ 292   | 32 | tccatctgccctcacaatatggtgaggtccta |
| mmu-miR-375-3p    | 1051 ~ 1070 | 20 | tcacctgtccatgaacaag              |
| mmu-miR-378-5p    | 1470 ~ 1491 | 22 | atcctccccaaagtcaggat             |
| mmu-miR-380-5p    | 1171 ~ 1191 | 21 | cactgttcataatcaaccta             |
| mmu-miR-181b-2-3p | 105 ~ 129   | 25 | aatgcaaatgctcatgattagtgat        |
| mmu-miR-384-3p    | 141 ~ 163   | 23 | acctcaagtatgttttaggaac           |
| mmu-miR-384-3p    | 921 ~ 944   | 24 | ggcatttacattagtctgggaat          |
| mmu-miR-196b-5p   | 327 ~ 348   | 22 | ttgacaataaaatgctacctg            |
| mmu-miR-409-3p    | 156 ~ 177   | 22 | ttaggaactttaatcaacattg           |
| mmu-miR-376b-5p   | 1358 ~ 1379 | 22 | ttcttttctttaatatccag             |
| mmu-miR-376b-3p   | 173 ~ 193   | 21 | cattgtttgtaatctgtgaa             |
| mmu-miR-412-3p    | 726 ~ 748   | 23 | atgtttgtatgggtgcaggatgat         |
| mmu-miR-365-2-5p  | 395 ~ 417   | 23 | tttaaagatttgggaagtccta           |
| mmu-miR-452-5p    | 1008 ~ 1036 | 29 | cactgattttttccagaactgtaaact      |
| mmu-miR-465a-5p   | 17 ~ 39     | 23 | ctactttctaataatttctaatac         |
| mmu-miR-466a-5p   | 629 ~ 650   | 22 | cacacacagagacgcacacata           |
| mmu-miR-466a-5p   | 230 ~ 248   | 19 | tctgactctaccacacatt              |
| mmu-miR-466a-5p   | 677 ~ 698   | 22 | cacacacacgtactcacacgtt           |
| mmu-miR-466a-5p   | 605 ~ 626   | 22 | cagacacagagacacacacaca           |

|                   |             |    |                                  |
|-------------------|-------------|----|----------------------------------|
| mmu-miR-466a-3p   | 696 ~ 718   | 23 | gttcatgcatgtgtgtgtata            |
| mmu-miR-466a-3p   | 730 ~ 756   | 27 | ttgtatgggtgcaggatgatgcata        |
| mmu-miR-467a-5p   | 906 ~ 928   | 23 | attacaaacatgtctggcattta          |
| mmu-miR-467a-3p   | 699 ~ 720   | 22 | catgcatgtgtgtgtatataca           |
| mmu-miR-468-5p    | 475 ~ 501   | 27 | ggttttttttttggagcatgagta         |
| mmu-miR-468-5p    | 910 ~ 936   | 27 | caaacatgtctggcattacattagtt       |
| mmu-miR-468-3p    | 53 ~ 74     | 22 | tagcccaataatcagtcag              |
| mmu-miR-470-5p    | 279 ~ 304   | 26 | atggtgaggtcctacattccaagaa        |
| mmu-miR-540-3p    | 876 ~ 899   | 24 | cagggatcctctgcctctgacat          |
| mmu-miR-539-5p    | 1195 ~ 1217 | 23 | aaagtcaagtgaatattttca            |
| mmu-miR-539-3p    | 714 ~ 736   | 23 | gtatacatgttcattgtatg             |
| mmu-miR-541-5p    | 1083 ~ 1115 | 33 | attgtaagatactcaaagattattaatccctc |
| mmu-miR-367-3p    | 1185 ~ 1205 | 21 | caacctactcaaagtgaagt             |
| mmu-miR-376c-5p   | 1358 ~ 1379 | 22 | ttctttctttaatatccag              |
| mmu-miR-20b-5p    | 954 ~ 982   | 29 | gcactaatgctcatgaggcaagcacttta    |
| mmu-miR-450a-2-3p | 1462 ~ 1483 | 22 | tcactgcatatcctcccaaaa            |
| mmu-miR-450a-2-3p | 27 ~ 48     | 22 | atatttctaaatcctcccaaaa           |
| mmu-miR-291b-3p   | 1320 ~ 1344 | 25 | attttgtattgatttgcacttg           |
| mmu-miR-302b-5p   | 1283 ~ 1308 | 26 | caaaagattttcccatggttaaate        |
| mmu-miR-302b-3p   | 954 ~ 981   | 28 | gcactaatgctcatgaggcaagcacttt     |
| mmu-miR-302c-3p   | 954 ~ 980   | 27 | gcactaatgctcatgaggcaagcactt      |
| mmu-miR-302d-5p   | 1283 ~ 1308 | 26 | caaaagattttcccatggttaaate        |
| mmu-miR-302d-3p   | 960 ~ 981   | 22 | atgctcatgaggcaagcacttt           |

|                   |             |    |                                  |
|-------------------|-------------|----|----------------------------------|
| mmu-miR-301b-3p   | 1320 ~ 1343 | 24 | atTTTTgtattgatttgcactt           |
| mmu-miR-592-5p    | 799 ~ 820   | 22 | aatttatctgcatagacacaga           |
| mmu-miR-1264-3p   | 1274 ~ 1293 | 20 | ataggattcaaaagatttt              |
| mmu-miR-1264-3p   | 408 ~ 433   | 26 | ggaagtcctaaggagcaagatttg         |
| mmu-miR-1264-3p   | 378 ~ 407   | 30 | ttaagtgttagctcttttaagatttt       |
| mmu-miR-551b-5p   | 995 ~ 1018  | 24 | tctccttagccaacacttgatttt         |
| mmu-miR-551b-5p   | 1304 ~ 1337 | 34 | aaatctcactttaggattttgtatttgatttt |
| mmu-miR-551b-5p   | 1244 ~ 1261 | 18 | atggtgacagttgattta               |
| mmu-miR-668-5p    | 990 ~ 1014  | 25 | atccatctccttagccaacacttga        |
| mmu-miR-668-5p    | 959 ~ 982   | 24 | aatgctcatgaggcaagcacttta         |
| mmu-miR-667-3p    | 760 ~ 785   | 26 | agatcagaaggtgtttgaggtgtca        |
| mmu-miR-669a-3p   | 702 ~ 729   | 28 | gcatgtgtgtgtatacatgttcatgt       |
| mmu-miR-760-3p    | 516 ~ 535   | 20 | taaaatttatccagagcca              |
| mmu-miR-760-3p    | 599 ~ 618   | 20 | cacacacagacacagagaca             |
| mmu-miR-488-5p    | 789 ~ 810   | 22 | tgaagaatgtaatttatctgca           |
| mmu-miR-495-5p    | 308 ~ 329   | 22 | ttggaattagttgttaacttt            |
| mmu-miR-495-3p    | 162 ~ 184   | 23 | actttaatcaacattgtttgtta          |
| mmu-miR-686       | 176 ~ 198   | 23 | tgtttgtaatctgtgaagtaat           |
| mmu-miR-691       | 1435 ~ 1457 | 23 | gattatatttttcttcaggaag           |
| mmu-miR-669b-3p   | 698 ~ 720   | 23 | tcatgcatgtgtgtgtataca            |
| mmu-miR-669a-3-3p | 702 ~ 729   | 28 | gcatgtgtgtgtatacatgttcatgt       |
| mmu-miR-467b-5p   | 908 ~ 929   | 22 | tacaacatgtctggcatttac            |
| mmu-miR-467b-3p   | 698 ~ 719   | 22 | tcatgcatgtgtgtgtataca            |

|                 |             |    |                            |
|-----------------|-------------|----|----------------------------|
| mmu-miR-669c-5p | 892 ~ 910   | 19 | tctgacatccaacaattac        |
| mmu-miR-669c-3p | 695 ~ 716   | 22 | cgttcacatgcatgtgtgtgta     |
| mmu-miR-297b-5p | 632 ~ 653   | 22 | acacagagacgcacacatacac     |
| mmu-miR-297b-3p | 697 ~ 718   | 22 | ttcatgcatgtgtgtgtgata      |
| mmu-miR-297b-3p | 487 ~ 509   | 23 | ttggagcatgagtatatgtaa      |
| mmu-miR-696     | 631 ~ 649   | 19 | cacacagagacgcacacat        |
| mmu-miR-491-3p  | 790 ~ 814   | 25 | gaagaatgtaatttatctgcataga  |
| mmu-miR-491-3p  | 1451 ~ 1474 | 24 | caggaagagtatcatctgcatatc   |
| mmu-miR-704     | 734 ~ 754   | 21 | atgggtgcaggtgatatgtca      |
| mmu-miR-704     | 487 ~ 508   | 22 | ttggagcatgagtatatgtaa      |
| mmu-miR-704     | 900 ~ 920   | 21 | ccaacaattacaacatgtct       |
| mmu-miR-706     | 519 ~ 543   | 25 | aattttatccagagccagttttca   |
| mmu-miR-708-5p  | 372 ~ 395   | 24 | tttagcttaagtgttagcttctt    |
| mmu-miR-709     | 875 ~ 894   | 20 | acagggatcctcctgcctct       |
| mmu-miR-501-3p  | 723 ~ 744   | 22 | ttcatgtttgtatgggtgcagg     |
| mmu-miR-505-3p  | 1226 ~ 1252 | 27 | tcagaattataagacagatgttgaca |
| mmu-miR-721     | 1321 ~ 1343 | 23 | ttttgtatttgatttgcactt      |
| mmu-miR-871-3p  | 522 ~ 539   | 18 | tttatccagagccagttt         |
| mmu-miR-881-3p  | 801 ~ 821   | 21 | tttatctgcatagacacagat      |
| mmu-miR-883b-3p | 1234 ~ 1256 | 23 | tataagacagatgttgacagttg    |
| mmu-miR-190b-5p | 900 ~ 920   | 21 | ccaacaattacaacatgtct       |
| mmu-miR-190b-5p | 1453 ~ 1475 | 23 | ggaagagtatcatctgcatatcc    |
| mmu-miR-190b-3p | 1112 ~ 1131 | 20 | cctcagaactttcattcagc       |



|                 |             |    |                                 |
|-----------------|-------------|----|---------------------------------|
| mmu-miR-876-5p  | 742 ~ 766   | 25 | aggtgatatgcatagagagatcag        |
| mmu-miR-876-3p  | 1154 ~ 1175 | 22 | tgaatTTTTatccaaaccactt          |
| mmu-miR-105     | 1319 ~ 1345 | 27 | gattttgtattgatttgcactgt         |
| mmu-miR-297a-3p | 697 ~ 718   | 22 | ttcatgcatgtgtgtgtgata           |
| mmu-miR-297a-3p | 487 ~ 509   | 23 | ttggagcatgagtatatgtaa           |
| mmu-miR-297c-5p | 632 ~ 653   | 22 | acacagagacgcacacatac            |
| mmu-miR-297c-5p | 569 ~ 593   | 25 | atctgtaccacaagcacagatac         |
| mmu-miR-297c-3p | 697 ~ 718   | 22 | ttcatgcatgtgtgtgtgata           |
| mmu-miR-297c-3p | 487 ~ 509   | 23 | ttggagcatgagtatatgtaa           |
| mmu-miR-343     | 404 ~ 424   | 21 | tttggagtcctaagggagt             |
| mmu-miR-421-5p  | 101 ~ 129   | 29 | athtaagcaaagctcatgattagtgat     |
| mmu-miR-453     | 949 ~ 977   | 29 | accaggcactaatgctcatgaggcaagca   |
| mmu-miR-465b-5p | 17 ~ 39     | 23 | ctactttctaataattctaaatc         |
| mmu-miR-465c-5p | 18 ~ 39     | 22 | tactttctaataattctaaatc          |
| mmu-miR-466b-5p | 630 ~ 651   | 22 | acacacagagacgcacacatac          |
| mmu-miR-466b-5p | 678 ~ 699   | 22 | acacacacgtactcacacgttc          |
| mmu-miR-466b-5p | 230 ~ 249   | 20 | tctgactctaccacacattt            |
| mmu-miR-466b-3p | 696 ~ 717   | 22 | gttcatgcatgtgtgtgtgat           |
| mmu-miR-466c-5p | 628 ~ 651   | 24 | acacacacagagacgcacacatac        |
| mmu-miR-466c-5p | 218 ~ 249   | 32 | gttgaacatgctctgactctaccacacattt |
| mmu-miR-466c-5p | 337 ~ 360   | 24 | aaatgctacctgacaaagacatct        |
| mmu-miR-466c-3p | 696 ~ 717   | 22 | gttcatgcatgtgtgtgtgat           |
| mmu-miR-466e-5p | 629 ~ 650   | 22 | cacacacagagacgcacacata          |

|                 |             |    |                               |
|-----------------|-------------|----|-------------------------------|
| mmu-miR-466e-5p | 230 ~ 248   | 19 | tctgactctaccacacatt           |
| mmu-miR-466e-5p | 677 ~ 698   | 22 | cacacacacgtactcacacgtt        |
| mmu-miR-466e-5p | 605 ~ 626   | 22 | cagacacagagacacacacaca        |
| mmu-miR-466e-3p | 696 ~ 718   | 23 | gttcatgcatgtgtgtgtata         |
| mmu-miR-466e-3p | 730 ~ 756   | 27 | ttgtatgggtgcaggatgatgcata     |
| mmu-miR-466f-5p | 677 ~ 698   | 22 | cacacacacgtactcacacgtt        |
| mmu-miR-466f-5p | 703 ~ 724   | 22 | catgtgtgtgtgtatacatgtt        |
| mmu-miR-466f-3p | 698 ~ 718   | 21 | tcatgcatgtgtgtgtata           |
| mmu-miR-466g    | 707 ~ 735   | 29 | tgtgtgtgtatacatgttcatgtttgtat |
| mmu-miR-466h-5p | 629 ~ 656   | 28 | cacacacagagacgcacacatacacaca  |
| mmu-miR-467c-3p | 698 ~ 719   | 22 | tcatgcatgtgtgtgtatac          |
| mmu-miR-467d-3p | 698 ~ 719   | 22 | tcatgcatgtgtgtgtatac          |
| mmu-miR-574-5p  | 614 ~ 636   | 23 | agacacacacagacacacaca         |
| mmu-miR-574-5p  | 670 ~ 692   | 23 | aaagacacacacacgtactca         |
| mmu-miR-574-5p  | 644 ~ 666   | 23 | acacatacacacagacacacaca       |
| mmu-miR-590-3p  | 121 ~ 139   | 19 | attagtataataaaatta            |
| mmu-miR-590-3p  | 450 ~ 471   | 22 | ttcatttgatatgctaaaattt        |
| mmu-miR-590-3p  | 1388 ~ 1409 | 22 | gatggccttagtctaaaatta         |
| mmu-miR-590-3p  | 504 ~ 523   | 20 | tgtaaatTTcttaaaattt           |
| mmu-miR-590-3p  | 321 ~ 342   | 22 | tgtaactttgacaataaaatgc        |
| mmu-miR-466d-5p | 605 ~ 626   | 22 | cagacacagagacacacacaca        |
| mmu-miR-466d-5p | 647 ~ 668   | 22 | catacacacagacacacacaca        |
| mmu-miR-466d-3p | 698 ~ 718   | 21 | tcatgcatgtgtgtgtata           |

|                 |             |    |                            |
|-----------------|-------------|----|----------------------------|
| mmu-miR-872-5p  | 188 ~ 212   | 25 | tgtgaagtaattccatgtaaccg    |
| mmu-miR-872-5p  | 308 ~ 329   | 22 | ttggaattagtgtgtaacttt      |
| mmu-miR-873-5p  | 683 ~ 703   | 21 | cacgtactcacacgttcacg       |
| mmu-miR-877-3p  | 68 ~ 89     | 22 | agtcacgagctctgaggagaca     |
| mmu-miR-582-5p  | 1012 ~ 1033 | 22 | tgattttttccagaactgtaa      |
| mmu-miR-467e-3p | 698 ~ 719   | 22 | tcatgcatgtgtgtgtgtatac     |
| mmu-miR-4661-5p | 636 ~ 657   | 22 | agagacgcacacatacacacag     |
| mmu-miR-4661-5p | 582 ~ 607   | 26 | gcacagatacaccctccacacacag  |
| mmu-miR-4661-5p | 660 ~ 681   | 22 | acacacacagaaagacacacac     |
| mmu-miR-669k-5p | 680 ~ 706   | 27 | acacacgtactcacacgttcacg    |
| mmu-miR-669k-5p | 630 ~ 654   | 25 | acacacagagacgcacacatacaca  |
| mmu-miR-669k-5p | 563 ~ 586   | 24 | aaaaaaatctgtaccacaagcaca   |
| mmu-miR-669k-3p | 700 ~ 722   | 23 | atgcatgtgtgtgtgtatacatg    |
| mmu-miR-669d-3p | 698 ~ 718   | 21 | tcatgcatgtgtgtgtgtata      |
| mmu-miR-466i-5p | 617 ~ 636   | 20 | cacacacagacacacacaca       |
| mmu-miR-466i-5p | 649 ~ 668   | 20 | tacacacagacacacacaca       |
| mmu-miR-466i-5p | 661 ~ 688   | 28 | cacacacagaaagacacacacacgta |
| mmu-miR-466i-5p | 581 ~ 606   | 26 | agcacagatacaccctccacacaca  |
| mmu-miR-466i-3p | 696 ~ 717   | 22 | gttcacgcatgtgtgtgtgtat     |
| mmu-miR-1b-5p   | 132 ~ 155   | 24 | taaaattaaacctcaagtatgtt    |
| mmu-miR-1187    | 628 ~ 650   | 23 | acacacacagagacgcacacata    |
| mmu-miR-1187    | 676 ~ 698   | 23 | acacacacacgtactcacacgtt    |
| mmu-miR-1187    | 598 ~ 624   | 27 | ccacacacagacacagacacacaca  |

|                 |           |    |                             |
|-----------------|-----------|----|-----------------------------|
| mmu-miR-1187    | 648 ~ 673 | 26 | atacacacagacacacacagaaag    |
| mmu-miR-1187    | 222 ~ 248 | 27 | gaacatgctctgactctaccacacatt |
| mmu-miR-669j    | 485 ~ 507 | 23 | ttttggagcatgagtatatgta      |
| mmu-miR-669f-5p | 644 ~ 668 | 25 | acacatacacacagacacacacaca   |
| mmu-miR-669f-5p | 616 ~ 639 | 24 | acacacacacagacacacacagag    |
| mmu-miR-669f-3p | 698 ~ 720 | 23 | tcatgcatgtgtgtgtataca       |
| mmu-miR-669i    | 489 ~ 507 | 19 | tggagcatgagtatatgta         |
| mmu-miR-669h-5p | 680 ~ 705 | 26 | acacacgtactcacacgttcatgcat  |
| mmu-miR-669h-3p | 699 ~ 722 | 24 | catgcatgtgtgtgtatacatg      |
| mmu-miR-466f    | 668 ~ 687 | 20 | agaaagacacacacacacgt        |
| mmu-miR-466f    | 638 ~ 657 | 20 | agacgcacacatacacacag        |
| mmu-miR-466f    | 604 ~ 625 | 22 | acagacacagagacacacacac      |
| mmu-miR-466f    | 702 ~ 723 | 22 | gcatgtgtgtgtgtatacatgt      |
| mmu-miR-466k    | 644 ~ 666 | 23 | acacatacacacagacacacaca     |
| mmu-miR-466k    | 602 ~ 624 | 23 | acacagacacagagacacacaca     |
| mmu-miR-466k    | 222 ~ 248 | 27 | gaacatgctctgactctaccacacatt |
| mmu-miR-466k    | 674 ~ 696 | 23 | acacacacacacgtactcacacg     |
| mmu-miR-467f    | 699 ~ 719 | 21 | catgcatgtgtgtgtgtatac       |
| mmu-miR-466j    | 626 ~ 648 | 23 | agacacacacagagacgcacaca     |
| mmu-miR-466j    | 698 ~ 720 | 23 | tcatgcatgtgtgtgtataca       |
| mmu-miR-1192    | 162 ~ 184 | 23 | actttaatcaacattgtttgta      |
| mmu-miR-1194    | 439 ~ 456 | 18 | agtctctagtattcattt          |
| mmu-miR-669e-5p | 620 ~ 642 | 23 | acacacagacacacacagagacg     |

|                 |             |    |                               |
|-----------------|-------------|----|-------------------------------|
| mmu-miR-467g    | 698 ~ 718   | 21 | tcatgcatgtgtgtgtata           |
| mmu-miR-1196-3p | 557 ~ 572   | 16 | attaaaaaaaaaatct              |
| mmu-miR-1897-5p | 1142 ~ 1170 | 29 | tactttcttatgtgaattttatccaaac  |
| mmu-miR-1897-5p | 880 ~ 905   | 26 | gatcctcctgcctctgacatccaaca    |
| mmu-miR-1897-5p | 508 ~ 532   | 25 | aattttcttaaaattttatccagag     |
| mmu-miR-1892    | 1463 ~ 1484 | 22 | catctgcatatcctcccaaac         |
| mmu-miR-1892    | 37 ~ 63     | 27 | atcctcccaaatgcttagcccaaat     |
| mmu-miR-1927    | 456 ~ 478   | 23 | tgatatgctaaaatttagagggt       |
| mmu-miR-1933-3p | 1377 ~ 1398 | 22 | cagggaaagtgtatggctcta         |
| mmu-miR-1935    | 877 ~ 898   | 22 | agggatcctcctgcctctgaca        |
| mmu-miR-1940    | 18 ~ 45     | 28 | tactttctaataatttctaaatcctcccc |
| mmu-miR-1940    | 1455 ~ 1480 | 26 | aagagtatcatctgcatatcctcccc    |
| mmu-miR-1942    | 342 ~ 362   | 21 | ctacctgacaagacatctta          |
| mmu-miR-1943-5p | 24 ~ 46     | 23 | ctaataatttctaaatcctccca       |
| mmu-miR-1943-5p | 1461 ~ 1481 | 21 | atcatctgcatatcctccca          |
| mmu-miR-1306-5p | 724 ~ 749   | 26 | tcatgtttgtatgggtgcagggtata    |
| mmu-miR-1306-3p | 990 ~ 1010  | 21 | atccatctccttagccaacac         |
| mmu-miR-1947-5p | 973 ~ 994   | 22 | aagcactttactatctcatcca        |
| mmu-miR-1950    | 721 ~ 744   | 24 | tgttcatgtttgtatgggtgcagg      |
| mmu-miR-6691-3p | 698 ~ 719   | 22 | tcatgcatgtgtgtgtatac          |
| mmu-miR-6691-3p | 730 ~ 757   | 28 | ttgtatgggtgcagggtgatgtcatag   |
| mmu-miR-669m-5p | 626 ~ 648   | 23 | agacacacacagagacgcacaca       |
| mmu-miR-669m-5p | 698 ~ 720   | 23 | tcatgcatgtgtgtgtataca         |

|                   |             |    |                            |
|-------------------|-------------|----|----------------------------|
| mmu-miR-669m-3p   | 698 ~ 719   | 22 | tcatgcatgtgtgtgtatac       |
| mmu-miR-669o-3p   | 702 ~ 729   | 28 | gcatgtgtgtgtatacatgttcatgt |
| mmu-miR-1954      | 1453 ~ 1472 | 20 | ggaagagtatcatctgcata       |
| mmu-miR-669n      | 590 ~ 609   | 20 | acaccctccacacacagac        |
| mmu-miR-669n      | 620 ~ 639   | 20 | acacacagacacacacagag       |
| mmu-miR-669n      | 642 ~ 659   | 18 | gcacacatacacacagac         |
| mmu-miR-669n      | 1119 ~ 1140 | 22 | actttcattcagccatacaaaa     |
| mmu-miR-1957      | 223 ~ 245   | 23 | aacatgctctgactctaccacac    |
| mmu-miR-1967      | 864 ~ 887   | 24 | gccagcaaaccacagggatcctcc   |
| mmu-miR-1969      | 242 ~ 268   | 27 | acacatttatgatgacattccatctg |
| mmu-miR-1969      | 973 ~ 998   | 26 | aagcactttactatctcatccatctc |
| mmu-miR-1983      | 727 ~ 748   | 22 | tgtttgtatgggtgcaggtgat     |
| mmu-miR-1839-5p   | 220 ~ 243   | 24 | tggaacatgctctgactctaccac   |
| mmu-miR-3057-5p   | 39 ~ 62     | 24 | cctccccaaatgcttagccccaaa   |
| mmu-miR-3068-5p   | 217 ~ 240   | 24 | agttggaacatgctctgactctac   |
| mmu-miR-3071-5p   | 1403 ~ 1425 | 23 | aaaattatttctggcaaatgacc    |
| mmu-miR-3074-1-3p | 438 ~ 462   | 25 | aagtctctagtattcatttgatag   |
| mmu-miR-3077-3p   | 402 ~ 427   | 26 | gattttggaagtcctaaggagtcaa  |
| mmu-miR-3084-5p   | 127 ~ 149   | 23 | gataataaaaattaacctcaag     |
| mmu-miR-466m-5p   | 626 ~ 648   | 23 | agacacacacagagacgcacaca    |
| mmu-miR-466m-5p   | 698 ~ 720   | 23 | tcatgcatgtgtgtgtataca      |
| mmu-miR-466m-3p   | 693 ~ 716   | 24 | cacgttcatgcatgtgtgtgtga    |
| mmu-miR-669d-2-3p | 698 ~ 719   | 22 | tcatgcatgtgtgtgtatac       |

|                   |             |    |                              |
|-------------------|-------------|----|------------------------------|
| mmu-miR-669d-2-3p | 730 ~ 757   | 28 | ttgtatgggtgcaggatgatgcatag   |
| mmu-miR-466o-5p   | 630 ~ 651   | 22 | acacacagagacgcacacatac       |
| mmu-miR-466o-5p   | 678 ~ 699   | 22 | acacacacgtactcacacgttc       |
| mmu-miR-466o-5p   | 230 ~ 249   | 20 | tctgactctaccacacattt         |
| mmu-miR-466o-3p   | 695 ~ 716   | 22 | cgttcatgcatgtgtgtgtgta       |
| mmu-miR-466o-3p   | 729 ~ 753   | 25 | ttgtatgggtgcaggatgatgctc     |
| mmu-miR-669p-3p   | 702 ~ 728   | 27 | gcatgtgtgtgtgtatacatgttcatg  |
| mmu-miR-466p-5p   | 630 ~ 650   | 21 | acacacagagacgcacacata        |
| mmu-miR-466p-5p   | 678 ~ 698   | 21 | acacacacgtactcacacgtt        |
| mmu-miR-466p-5p   | 230 ~ 248   | 19 | tctgactctaccacacatt          |
| mmu-miR-466p-5p   | 606 ~ 626   | 21 | agacacagagacacacacaca        |
| mmu-miR-466p-3p   | 696 ~ 717   | 22 | gttcatgcatgtgtgtgtgat        |
| mmu-miR-466n-5p   | 628 ~ 649   | 22 | acacacacagagacgcacacat       |
| mmu-miR-3087-5p   | 253 ~ 273   | 21 | gatgacattccatctgcctc         |
| mmu-miR-3088-5p   | 790 ~ 814   | 25 | gaagaatgtaatttatctgcataga    |
| mmu-miR-3088-5p   | 1447 ~ 1474 | 28 | tcttcaggaagagtatcatctgcatatc |
| mmu-miR-3088-3p   | 99 ~ 122    | 24 | atatttaatgcaaatgctcatgat     |
| mmu-miR-3088-3p   | 947 ~ 970   | 24 | aaaccaggcactaatgctcatgag     |
| mmu-miR-3088-3p   | 525 ~ 547   | 23 | atccagagccagttttcatgat       |
| mmu-miR-3089-3p   | 1221 ~ 1248 | 28 | gaatttcagaatttataagacagatggt |
| mmu-miR-3092-5p   | 1279 ~ 1298 | 20 | atttcaaaagattttcca           |
| mmu-miR-3094-5p   | 28 ~ 49     | 22 | tatttctaaatcctcccaaat        |
| mmu-miR-3094-3p   | 456 ~ 476   | 21 | tgatatgctaaaatttagagg        |

|                 |             |    |                             |
|-----------------|-------------|----|-----------------------------|
| mmu-miR-3094-3p | 383 ~ 403   | 21 | tgttagctcttttaaaga          |
| mmu-miR-3096-3p | 1090 ~ 1113 | 24 | gatactcaaagattattaatccc     |
| mmu-miR-3096-3p | 36 ~ 59     | 24 | aatcctcccaaatgcttagcccc     |
| mmu-miR-3097-5p | 1038 ~ 1059 | 22 | gtaaaactaattgtcacctgtg      |
| mmu-miR-3100-3p | 734 ~ 757   | 24 | atgggtgcaggtgatatgtcatag    |
| mmu-miR-344b-3p | 836 ~ 858   | 23 | taagtcaccaattaggctaaacc     |
| mmu-miR-3103-3p | 458 ~ 479   | 22 | atagctaaaatttagaggttt       |
| mmu-miR-3109-5p | 973 ~ 996   | 24 | aagcactttactatctcatccatc    |
| mmu-miR-3113-5p | 1470 ~ 1491 | 22 | ataticccccaaagtcaggat       |
| mmu-miR-3470a   | 1184 ~ 1201 | 18 | tcaacctactcaaagtgc          |
| mmu-miR-1186b   | 1093 ~ 1114 | 22 | actcaaagattatttaacccct      |
| mmu-miR-3962    | 328 ~ 347   | 20 | ttgacaataaaatgctacct        |
| mmu-miR-3969    | 1296 ~ 1320 | 25 | ccatggtaaattctcacttagga     |
| mmu-miR-3970    | 579 ~ 597   | 19 | caagcacagatacacccctt        |
| mmu-miR-5098    | 189 ~ 209   | 21 | gtgaagtaattccatgtaac        |
| mmu-miR-5101    | 894 ~ 917   | 24 | tgacatccaacaattacaacatg     |
| mmu-miR-5107    | 249 ~ 272   | 24 | ttatgatgacattccatctgcct     |
| mmu-miR-5110    | 976 ~ 1002  | 27 | cactttactatctcatccatctcctta |
| mmu-miR-5113    | 876 ~ 896   | 21 | cagggatcctctgcctctga        |
| mmu-miR-5117-5p | 820 ~ 847   | 28 | atattttattgtctctaagtcaccaat |
| mmu-miR-5120    | 40 ~ 62     | 23 | ctcccaaatgcttagcccaaaa      |
| mmu-miR-5121    | 563 ~ 584   | 22 | aaaaaaatctgtaccacaagca      |
| mmu-miR-466q    | 696 ~ 717   | 22 | gttcatgcatgtgtgtgtat        |



|                 |           |    |                            |
|-----------------|-----------|----|----------------------------|
| mmu-miR-5129    | 255 ~ 277 | 23 | tgacattccatctgccctcacia    |
| mmu-miR-1231-3p | 859 ~ 882 | 24 | atgtggccagcaaaccacaggat    |
| mmu-miR-5617-5p | 527 ~ 554 | 28 | ccagagccagttttcatgatcactta |
| mmu-miR-5619-5p | 106 ~ 130 | 25 | atgcaaatgctcatgattagtata   |
| mmu-miR-5619-3p | 519 ~ 543 | 25 | aattttatccagagccagttttca   |
| mmu-miR-5620-5p | 870 ~ 895 | 26 | aaaccacaggatcctcctgcctctg  |
| mmu-miR-5623-5p | 248 ~ 271 | 24 | tttatgatgacattccatctgcc    |
